# Supplementary material for: Metabolic Reprogramming by 3-Iodothyronamine (T1AM): A New Perspective to Reverse Obesity through Co-Regulation of Sirtuin 4 and 6 Expression
Source: MDPI journal article supplement (doi:10.3390/ijms19051535), 2018-05-22
Supplement: s1 [file s1]

# **Supplementary Material: Metabolic Reprogramming by 3-Iodothyronamine (T1AM): A New Perspective to Reverse Obesity through Co-regulation of Sirtuin 4 and 6 Expression**

**Fariba M. Assadi-Porter, Hannah Reiland, Martina Sabatini, Leonardo Lorenzini, Vittoria Carnicelli, Micheal Rogowski, Ebru S. Selen Alpergin, Marco Tonelli, Sandra Ghelardoni, Alessandro Saba, Riccardo Zucchi and Grazia Chiellini**

## **Gene expression study**

Expression of genes (Table S1) was evaluated in 4 tissues (liver, subcutaneous adipose tissue, skeletal muscle, and heart) from the 18 mice by reverse transcription qPCR. Two to three reference genes were chosen for each tissue type as reference genes [1]. Each choice was based on testing expression stability of 9 candidate reference genes (Table S2) in tissue specific experiments including all 18 samples. The expression stability of each gene was assessed using geNorm version 3.5 [2].

**Table S1.** primer sequences of target genes.

| Gene Symbol | RefSeq mRNA  | Forward Primer               | Reverse Primer                 |
|-------------|--------------|------------------------------|--------------------------------|
| acsl5       | NM_027976    | 5'-ATCCCTGTGGTCATCTGT-3'     | 5'-GCCTATATTCTCCGCATCAT-3'     |
| apoD        | NM_007470    | 5'-TGGAGAACGGAAACATCG-3'     | 5'-GTGGCATCAACGGGAAGA-3'       |
| insig2a     | NM_178082    | 5'-CAATGAATGTACTGAAGGATTT-3' | 5'-GAAGTGAAGCAGACCAAT-3'       |
| insig2b     | NM_133748    | 5'-CCGGGCAGAGCTCAGGAT-3'     | 5'-GAAGCAGACCAATGTTTCAATGG-3'  |
| ldlrap1     | NM_145554    | 5'-CCAAGGAAGAGAAAGAGA-3'     | 5'-CGCTGACTGTAGATAACG-3'       |
| me1         | NM_001198933 | 5'-TAACGATGATATTCAAGGAACA-3' | 5'-TAACAACCAAGTGAGCAAT-3'      |
| Gk          | NM_010292    | 5'-TGCGGAGATGCTCTTTGA-3'     | 5'-TTGTCTATGTCTTCGTGCCTTA-3'   |
| igfbp2      | NM_008342    | 5'-CCCTGGAACATCTCTACT-3'     | 5'-GTATTGGGGTTCACACAC-3'       |
| Cebp        | NM_009883    | 5'-CGGGTTTCGGGACTTGAT-3'     | 5'-CCGCAGGAACATCTTTAAG-3'      |
| abcd2       | NM_011994    | 5'-TCGTGTATGCCACTGCTAA-3'    | 5'-TCATTTCTACCTTATGTCCTCTGT-3' |
| abcd3       | NM_008991    | 5'-AGAATGGCGATGGCAAGAC-3'    | 5'-GTGAAACGGTAAAGAGGGTGAT-3'   |
| abcd4       | NM_008992    | 5'-GAGGATTGTGAGGTTCTTG-3'    | 5'-CAGGACATCATAACCAGTTC-3'     |
| Ppara       | NM_001113418 | 5'-CCACGAAGCCTACCTGAAG-3'    | 5'-GCCATACACAAGGTCTCCAT-3'     |
| Pparbd      | NM_011145    | 5'-TGCTGTCAAGTTCAATGC-3'     | 5'-CTGGATGGCTTCTACCTG-3'       |
| Pparg       | NM_001127330 | 5'-CTCACAATGCCATCAGGTT-3'    | 5'-TCGCAGATCAGCAGACTC-3'       |
| sirt1       | NM_001159589 | 5'-CAGAACCACCAAAGCGGAAA-3'   | 5'-GCAAGGCGAGCATAGATACC-3'     |
| sirt2       | NM_001122766 | 5'-CAGTTCAAGCCAACCATCT-3'    | 5'-CTCGTTCCAGCGTGTCTA-3'       |
| sirt3       | NM_001177804 | 5'-CCAATGTCACTCACTACTTCC-3'  | 5'-TCCCAGATGCTCTCTCAAG-3'      |
| sirt4       | NM_133760    | 5'-GTGTGAAAGAGGCGGACT-3'     | 5'-GTGAGGATGAACCTGTAACCA-3'    |
| sirt6       | NM_001163430 | 5'-CCAAGTGTAAAGACGCAGTA-3'   | 5'-TCCTCCCAGTCCAGAATG-3'       |

**Table S2.** primer sequences of reference genes.

| <b>Gene Symbol</b> | <b>RefSeq RNA</b> | <b>Forward Primer</b>          | <b>Reverse Primer</b>        |
|--------------------|-------------------|--------------------------------|------------------------------|
| actb               | NM_007393         | 5'-GCCTTCCTTCTTGGGTAT-3'       | 5'-GGTCTTTACGGATGTCAAC-3'    |
| b2m                | NM_009735         | 5'-TGGTCTTTCTGGTGCTTGTC-3'     | 5'-AGTTCAGTATGTTCGGCTTCC-3'  |
| gusb               | NM_010368         | 5'-CGGTTGTGATGTGGTCTGT-3'      | 5'-GGCTTTGGTGTGGGTGAT-3'     |
| hprt               | NM_013556         | 5'-TGATTATGGACAGGACTGAAAGA-3'  | 5'-CAGCAGGTCAGCAAAGAAC-3'    |
| kdm2b              | NM_013910         | 5'-TGGAAGAGGAAGAAGGCAAGTT-3'   | 5'-GTTGACCACACCCTCCGATT-3'   |
| ppia               | NM_008907         | 5'-GACTGAATGGCTGGATGG-3'       | 5'-ATCTTCTTGCTGGTCTTGC-3'    |
| psmd4              | NM_008951         | 5'-GAAGGAGGCAAGATGGTGTT-3'     | 5'-CGGGTGGAAGGAAGTCT-3'      |
| tbp                | NM_013684         | 5'-GCCTTCCACCTTATGCTC-3'       | 5'-AGTAAGTCCTGTGCCGTAA-3'    |
| rpl13              | NM_016738         | 5'-GTGAGGTGCCCTACAGTGAGATAC-3' | 5'-GATGGTGCGAGCCACTTTCTTG-3' |

## Reference

1. Kouadjo, K.E.; Nishida, Y.; Cadrin-Girard, J.F.; Yoshioka, M.; St-Amand, J. Housekeeping and tissue-specific genes in mouse tissues. *BMC Genom.* **2007**, *8*, 127.
2. Vandesompele, J.; de Preter, K.; Pattyn, F.; Poppe, B.; van Roy, N.; de Paepe, A.; Speleman, F. Accurate normalization of real-time quantitative RT-PCR data by geometric averaging of multiple internal control genes. *Genome Biol.* **2002**, *3*, research0034.1.
